# Supplementary material for: Novel Ru nanoparticle catalysts for the catalytic transfer hydrogenation of biomass-derived furanic compounds
Source: Royal Society of Chemistry journal article supplement (doi:10.1039/d0se00361a), 2020-01-01
Supplement: d0se00361a1.pdf [file d0se00361a1.pdf]

# Electronic Supplementary Information (ESI)

## Novel Ru nanoparticles catalysts for Catalytic Transfer Hydrogenation of biomass-derived furanic compounds

Atul S. Nagpure\*,<sup>[a,b]</sup> Pranjal Gogoi,<sup>[a,d]</sup> Nishita Lucas<sup>[a]</sup> and Satyanarayana V. Chilukuri\*<sup>[a,c]</sup>

<sup>[a]</sup> Catalysis & Inorganic Chemistry Division, CSIR-National Chemical Laboratory, Dr. Homi Bhabha Road, Pune-411008, INDIA. Tel: +91-9890626115. \*E-mail: [satya.cvv@gmail.com](mailto:satya.cvv@gmail.com)

<sup>[b]</sup> Department of Chemistry, Rashtrapita Mahatma Gandhi Arts & Science College, Nagbhid, Dist-Chandrapur, Maharashtra-441205, INDIA. Tel: +91-9763190023. \*E-mail: [atulnagpure43@gmail.com](mailto:atulnagpure43@gmail.com)

<sup>[c]</sup> Hindustan Petroleum Green Research and Development Centre, HP Crop. Ltd. Bengaluru-560067, INDIA.

<sup>[d]</sup> Academy of Scientific and Innovative Research (AcSIR), Gaziabad 201002, Uttar Pradesh, INDIA.

\*E-mail: [satya.cvv@gmail.com](mailto:satya.cvv@gmail.com) (Dr. Satyanarayana V. Chilukuri)

\*E-mail: [atulnagpure43@gmail.com](mailto:atulnagpure43@gmail.com) (Dr. Atul S. Nagpure)

### 1. Experimental section:

#### 1.1. Preparation of catalysts

##### 1.1.1. Preparation of nitrogen-doped mesoporous carbons (NMC's)

The NMC's with tunable N-content were prepared by sol-gel process, employing melamine as a nitrogen precursor (Scheme S1).<sup>[1,2]</sup> In a typical synthesis method, 78 mmol of formaldehyde (37 wt%, 6.33 g) along with 39 mmol of phenol (3.67 g) was added dropwise into 50 mL of aqueous sodium hydroxide solution (10 mmol, 0.2 M) at constant stirring. The resulting mixture was continuously stirred for 20 min at room temperature and subsequently heated to 70 °C in an oil bath, which was continued for 40 minutes. To this, 39 mmol of melamine (4.92 g) as nitrogen source plus additional amount of formaldehyde (107 mmol, 9.5 g) was added and the mixture was stirred again for 30 minutes. After that, Ludox SM-30 sol (50 g, 30 wt% SiO<sub>2</sub>) was added with vigorous stirring for 1 h. The final mixture was subsequently added into a sealed bottle and continuously heated again for 3 more days at 80 °C temperature. The acquired gel was dried out at 80 °C and made into fine powder. The material was carbonized in presence of nitrogen gas flow at 800 °C temperature for 3 h by growing the temperature at a heating rate of 5 °C per minute. The obtained material contained SiO<sub>2</sub>, which was completely removed through treatment with aqueous NaOH (2 M) under constant stirring for 12 h at 80 °C. The final material was properly washed by deionized water until the pH reached neutral. Afterward, the sample was dry for 10 h at 100 °C temperature. The NMC's with different N-contents were prepared via

altering the melamine to phenol molar ratio. The nitrogen-free mesoporous carbon (MC) was also prepared by using above process without addition of melamine.

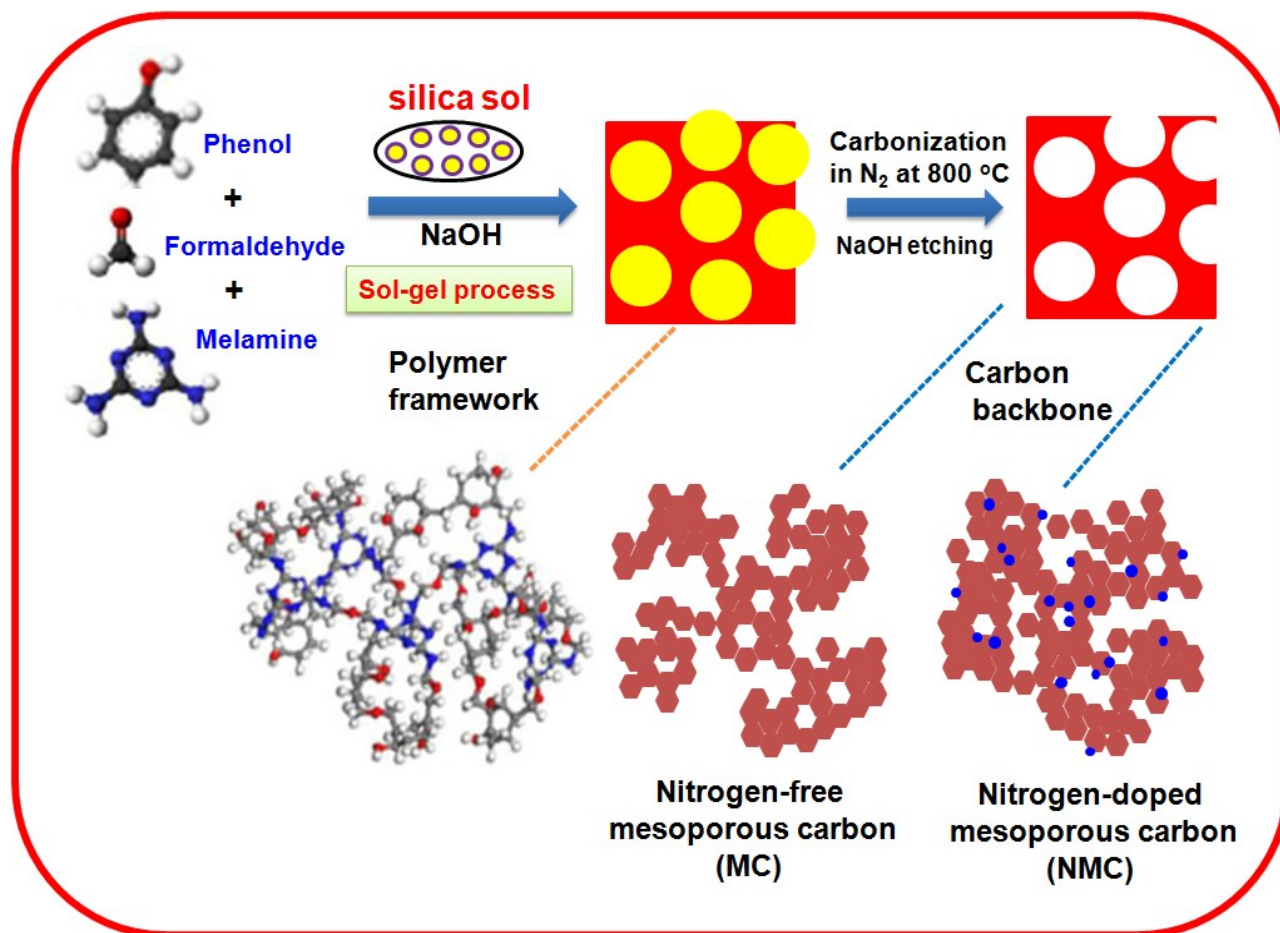

**Scheme S1** Schematic illustration of NMC's and MC synthesis.<sup>[2]</sup>

### 1.1.2. Preparation of 2wt% M-NMC (M = Ru, Pd, Au, Pt, Ni, Rh and Cu) catalysts

The metal nanoparticles catalysts supported on NMC's were prepared by a modified ultrasonic-assisted method.<sup>[2]</sup> For the preparation of 2wt% Ru-NMC catalyst, NMC material (100 mg) was initially dispersed in deionized water (50 mL) by ultrasonication for 20 minutes. To this, an aqueous solution of RuCl<sub>3</sub> (0.5 mL, Ru amount 4 mg per mL) was added under agitation in an ultrasonicator. The resulting suspension was constantly stirred for 6 h at 80 °C and this mixture was cooled under room temperature. To this, NaBH<sub>4</sub> aqueous solution (Ru/NaBH<sub>4</sub> = 1:4 mol mol<sup>-1</sup>) was added slowly under ultrasonication for 30 minutes to get Ru into metallic state. This mixture was filtered, also washed by deionized water until Cl<sup>-</sup> ions were absent (silver nitrate test). The resulting 2wt% Ru-NMC catalyst was dry for 10 h at 80 °C temperature. Activated carbon (AC) and MC supported Ru catalysts were also prepared by following the

above procedure. Furthermore, a analogous method was applied for the synthesis of 2wt% Pt-NMC, 2wt% Rh-NMC, 2wt% Pd-NMC, 2wt% Au-NMC, 5wt% Ni-NMC and 5wt% Cu-NMC catalysts.

### 1.1.3. Preparation of 2wt% Ru-metal oxide catalysts (metal oxide = CeO<sub>2</sub>, MgO, Mg(Al)O, $\gamma$ -Al<sub>2</sub>O<sub>3</sub> and TiO<sub>2</sub>)

Metal oxide supported Ru catalysts were synthesized by deposition-precipitation process.<sup>[3]</sup> In a typical preparation of 2wt% Ru-CeO<sub>2</sub> catalyst, required amount of aqueous solution of RuCl<sub>3</sub> ( $7.5 \times 10^{-4}$  M) was heated at 70 °C under steady stirring. To this, 1 g of CeO<sub>2</sub> was added. Subsequently, the solution pH was maintained to 9 by dropwise addition of 0.2 M aqueous sodium hydroxide. Afterward, the mixture was stirred for 2 h at 70 °C and allowed to cool at room temperature. Following this, aqueous solution of NaBH<sub>4</sub> (Ru/NaBH<sub>4</sub> = 1:4 mol mol<sup>-1</sup>) was added dropwise to above suspension under constant stirring at room temperature for 30 minutes to get Ru into metallic state. The solution was filtered as well as washed with deionized water to remove Cl<sup>-</sup> ions (silver nitrate test). The 2wt% Ru-CeO<sub>2</sub> catalyst was dried out for 10 h at 80 °C. Similar procedure was used for the preparation of 2wt% Ru-MgO, 2wt% Ru-Mg(Al)O, 2wt% Ru- $\gamma$ -Al<sub>2</sub>O<sub>3</sub> and 2wt% Ru-TiO<sub>2</sub> catalysts.

## 1.2. Characterization techniques

The XRD of all the materials were collected by means of a PANalytical X'pert Pro dual goniometer. Copper K $\alpha$  light having wavelength of 1.5406 Å operating at 40 kV and 30 mA with Nickel filter was employed to obtain the spectra. The XRD spectra was recorded from 5–90° of 2 $\theta$  range (through 0.02° step size).

N<sub>2</sub> sorption isotherm was used to estimate BET surface area of all the materials over Quantachrome Autosorb IQ instrument at -196 °C. Prior to N<sub>2</sub> sorption, the materials were evacuated to a residual pressure of  $2 \times 10^{-3}$  Torr for 3 h at 250 °C. BJH method were utilized to calculate average pore diameter of the materials by the use of desorption branch of N<sub>2</sub> sorption isotherm.

LabRAM HR800 instrument was employed to gather Raman spectra of the materials using He-Ne Laser ( $\lambda = 632.84$  nm) working at 20 mW of power.

FEI Technai TF-30 equipment functioning at 300 kV were exploited to collect the TEM images of the samples. For taking TEM images of the materials, the samples were prepared via introducing a drop of diluted sample (made in 2-propanol solvent in ultrasonicator) on top of a carbon-covered copper grid. After that, grid was allowed to dry at room temperature.

VG Microtech Multilab ESCA 3000 instrument were utilized to collect XPS spectra of the samples with Mg K $\alpha$  light having energy of 1253.6 eV. In analyzing chamber the base pressure of  $3\text{--}6 \times 10^{-10}$  mbar was maintained. Peak associated to carbon 1s (appearing at binding energy of 284.5 eV) was consider as standard in measuring the binding energy of other elements in the sample.

TENSOR-27 (Bruker Optic) instrument were employed to collect FT-IR spectra of the samples. The material was thoroughly mixed with KBr and analyzed in the frequency range of 500-4000 cm<sup>-1</sup>.

ICP-OES (Spectro Arcos, FHS-12) instrument was exploited to calculate the amount of metal present in the catalysts. Standard solutions containing different elements were used for the calibration purpose. The catalysts were digested with aqua-regia before ICP-OES analysis.

Micromeritics Autochem-2920 instrument was used to estimate the basicity of the samples by CO<sub>2</sub>-TPD study. Previous to the analysis, the sample was heated at 300 °C temperature for 1 h under steady Helium gas flow (40 mL/min). Subsequently, the sample temperature was decreased to 50 °C. Afterward, sample was exposed to 10% CO<sub>2</sub> in Helium gas flow for 0.5 h (30 mL per min). Next, the sample temperature was elevated to 100 °C in order to take out physisorbed CO<sub>2</sub> through flushing with Helium gas (1 h). Further, temperature was raised from 100 to 800 °C for CO<sub>2</sub> gas desorption in Helium gas flow at a steady heating speed (10 °C per min) and the extent of CO<sub>2</sub> desorbed was estimated quantitatively by TCD detector. Before CO<sub>2</sub>-TPD study TCD detector was calibrated.

Micromeritics Autochem-2920 device having calibrated TCD detector was exploited for H<sub>2</sub>-TPR study of metal catalysts. Earlier to TPR run, the sample was heated under 300 °C temperature using 5% O<sub>2</sub> in Helium gas mixture at a steady heating speed (10 °C per min) for 1 h. Consequently, sample was cooled to 40 °C and gas flow has altered to 5% H<sub>2</sub> in Argon gas (at speed of 30 mL per min), also the sample was heated to 700 °C temperature at a steady heating speed (5 °C per min). The difference in H<sub>2</sub> gas amount at the outlet was measured quantitatively by TCD.

| <b>Table S1</b> Physico-chemical properties of supported metal catalysts. |                                      |                                    |                                                 |
|---------------------------------------------------------------------------|--------------------------------------|------------------------------------|-------------------------------------------------|
| Catalyst                                                                  | BET surface area (m <sup>2</sup> /g) | Metal content <sup>[a]</sup> (wt%) | Average Metal particle size <sup>[b]</sup> (nm) |
| 2 wt% Pt-NMC-3                                                            | 780                                  | 1.86                               | 2.7                                             |
| 2 wt% Pd-NMC-3                                                            | 791                                  | 2.05                               | 2.4                                             |
| 2 wt% Rh-NMC-3                                                            | 765                                  | 1.93                               | 2.3                                             |
| 2 wt% Au-NMC-3                                                            | 760                                  | 1.82                               | 5.6                                             |
| 5 wt% Ni-NMC-3                                                            | 730                                  | 4.76                               | 4.2                                             |
| 5 wt% Cu-NMC-3                                                            | 725                                  | 4.84                               | 4.5                                             |
| 2 wt% Ru-AC                                                               | 991                                  | 1.81                               | 3.5                                             |
| 2 wt% Ru-CeO <sub>2</sub>                                                 | 105                                  | 1.76                               | 2.9                                             |
| 2 wt% Ru-MgO                                                              | 91                                   | 1.82                               | 3.2                                             |
| 2 wt% Ru-Mg(Al)O                                                          | 130                                  | 1.79                               | 3.7                                             |
| 2 wt% Ru-TiO <sub>2</sub>                                                 | 36                                   | 1.86                               | 3.4                                             |
| 2 wt% Ru-γ-Al <sub>2</sub> O <sub>3</sub>                                 | 240                                  | 1.82                               | 2.9                                             |

[a] Estimated by ICP-OES. [b] Calculated from TEM analysis.

**Table S2** Physico-chemical properties of fresh and used Ru catalysts.

| Catalyst              | Fresh Catalysts                 |                                              |                                      |                                         |                                       | Used Catalysts                  |                                              |                                      |                                         |                                       |
|-----------------------|---------------------------------|----------------------------------------------|--------------------------------------|-----------------------------------------|---------------------------------------|---------------------------------|----------------------------------------------|--------------------------------------|-----------------------------------------|---------------------------------------|
|                       | Ru content <sup>[a]</sup> (wt%) | Average Ru particle size <sup>[c]</sup> (nm) | BET surface area (m <sup>2</sup> /g) | Total pore volume <sup>[b]</sup> (cc/g) | Nitrogen-content <sup>[d]</sup> (wt%) | Ru content <sup>[a]</sup> (wt%) | Average Ru particle size <sup>[c]</sup> (nm) | BET surface area (m <sup>2</sup> /g) | Total pore volume <sup>[b]</sup> (cc/g) | Nitrogen-content <sup>[d]</sup> (wt%) |
| <b>2 wt% Ru-MC</b>    | 1.92                            | 6.1                                          | 722                                  | 0.71                                    | --                                    | 1.71                            | 6.9                                          | 701                                  | 0.60                                    | --                                    |
| <b>2 wt% Ru-NMC-1</b> | 1.89                            | 3.1                                          | 792                                  | 1.04                                    | 5.0                                   | 1.86                            | 3.4                                          | 763                                  | 0.88                                    | 4.8                                   |
| <b>2 wt% Ru-NMC-2</b> | 1.91                            | 2.5                                          | 849                                  | 1.10                                    | 8.0                                   | 1.89                            | 2.8                                          | 827                                  | 1.06                                    | 7.7                                   |
| <b>2 wt% Ru-NMC-3</b> | 1.95                            | 1.9                                          | 805                                  | 1.05                                    | 11.4                                  | 1.93                            | 2.0                                          | 780                                  | 1.02                                    | 11.2                                  |

[a] Estimated by ICP-OES. [b] Total pore volume at  $P/P_0 = 0.9$ . [c] Calculated from TEM analysis. [d] Calculated using elemental analysis.

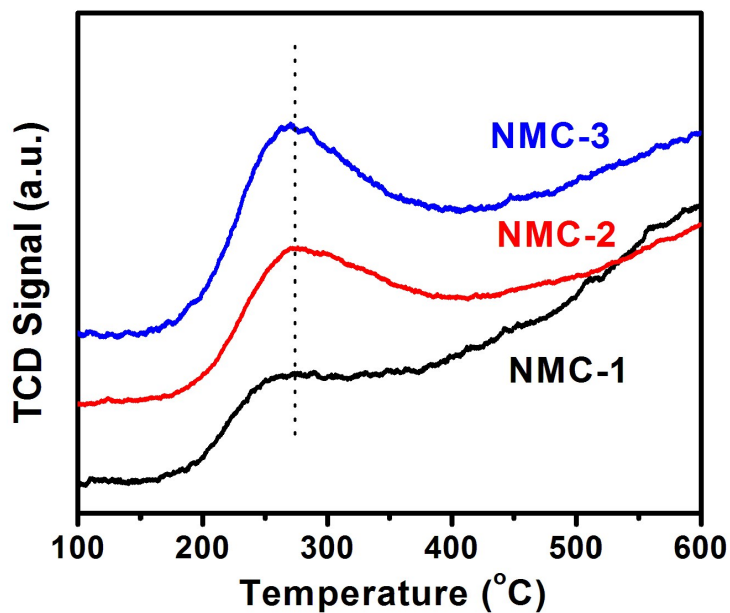**Fig. S1** CO<sub>2</sub>-TPD profiles of NMC-1, NMC-2 and NMC-3 sample.

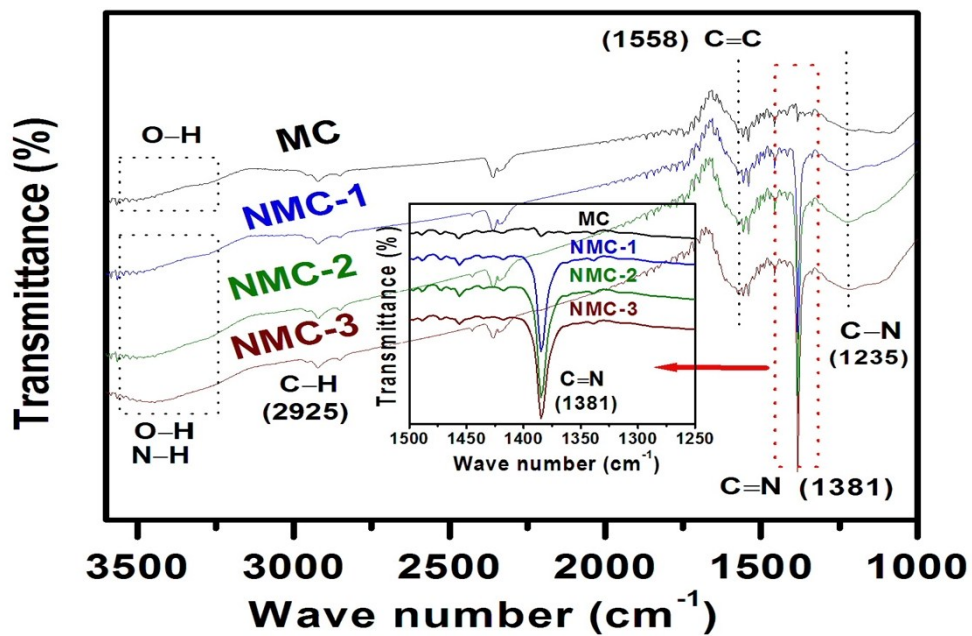

Fig. S2 FT-IR spectra of MC, NMC-1, NMC-2 and NMC-3.

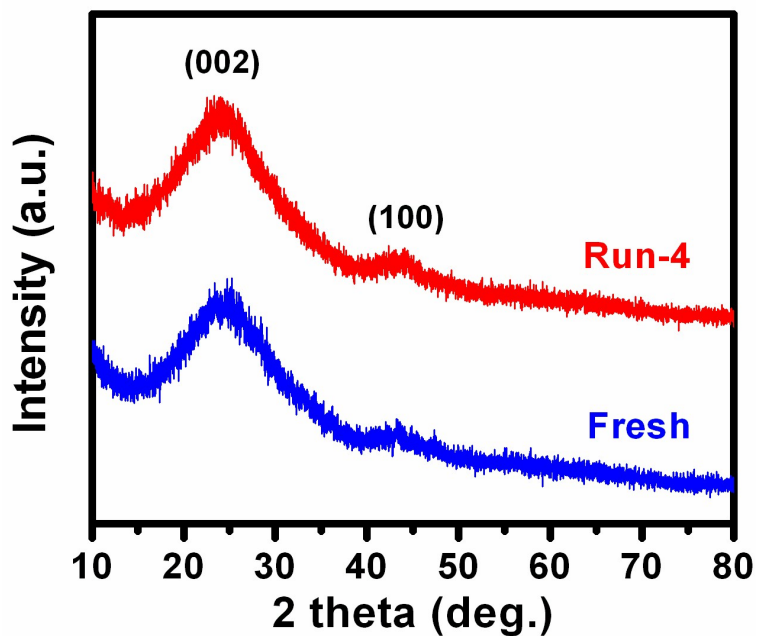

Fig. S3 XRD patterns of the fresh and used (after 4 cycles) 2wt% Ru-NMC-3 catalyst.

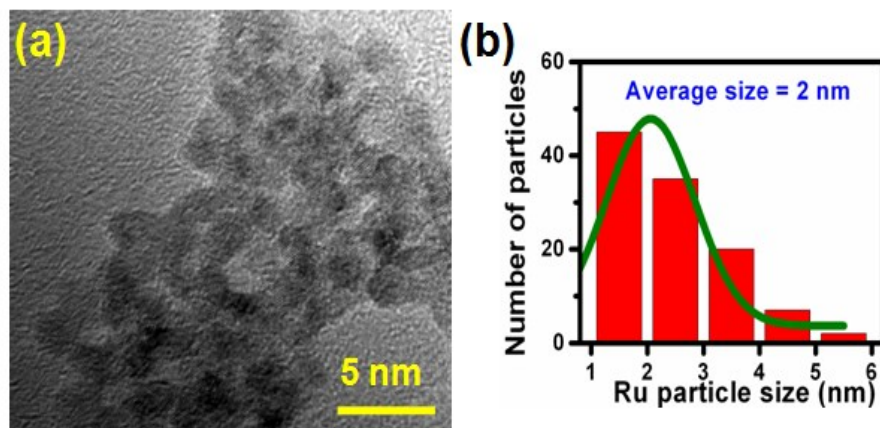

**Fig. S4** (a) TEM image and (b) Ru nanoparticles size distribution of reused (after 4 recycles) 2wt% Ru-NMC-3 catalyst.

## 2. Estimation of Ru metal dispersion using average Ru metal nanoparticles size:

The average particle size of Ru metal nanoparticles in various Ru-NMC catalysts was exploited to estimate Ru metal dispersion by taking into consideration spherical shape of nanoparticles as well as using the equation given by Scholten et al.<sup>[4]</sup>

$$D = 10^{21} \times \frac{6 \times M \times \rho_{\text{site}}}{d \times \rho_{\text{metal}} \times N}$$

**Ru metal dispersion (%) = Ru metal dispersion (D) x 100**

**D** = Ru metal dispersion

**M** = atomic weight of Ru (101 g/mol)

$\rho_{\text{site}}$  = metal surface site density for Ru (16.3 atoms/nm<sup>2</sup>)

**d** = average metal particle size estimated from TEM in nanometers

$\rho_{\text{metal}}$  = metal density for Ru (12.3 g/cm<sup>3</sup>)

**N** = Avogadro constant, giving **D** = 1.33/**d** (nm) for Ru.

### References:

- [1] H. Chen, F. Sun, J. Wang, W. Li, W. Qiao, L. Ling and D. Long, *J. Phys. Chem. C*, 2013, **117**, 8318.
- [2] A. S. Nagpure, L. Gurrala, P. Gogoi and S. V. Chilukuri, *RSC Adv.*, 2016, **6**, 44333.
- [3] M. -M. Wang, L. He, Y. -M. Liu, Y. Cao, H. -Y. He and K. -N. Fan, *Green Chem.*, 2011, **13**, 602.
- [4] J. J. F. Scholten, A. P. Pijpers and M. L. Hustings, *Catal. Rev. Sci. Eng.*, 1985, **27**, 151.

**Table S3** Literature review for selective conversion of 5-hydroxymethylfurfural (HMF) to 2,5-dimethylfuran (DMF) and furfural to 2-methylfuran (MF) over metal catalysts.

**Part A: Hydrogenolysis of HMF to DMF over various metal catalysts.**

| Entry  | Catalyst                                                          | Hydrogen source          | Solvent                              | Temp. (°C) | Time (h) | HMF conv. (%) | DMF yield (%) | Ref.      |
|--------|-------------------------------------------------------------------|--------------------------|--------------------------------------|------------|----------|---------------|---------------|-----------|
| 1.     | 2wt% Ru-NMC-3                                                     | 2-propanol               | 2-propanol                           | 160        | 8        | 100           | 84            | This work |
| 2.     | CuCrO <sub>4</sub>                                                | H <sub>2</sub> (6.8 bar) | 1-butanol                            | 220        | 10       | 100           | 61            | 1         |
| 3.     | Cu-Ru/C                                                           | H <sub>2</sub> (6.8 bar) | 1-butanol                            | 220        | 10       | 100           | 71            | 1         |
| 4. [a] | Cu-Ru/C                                                           | H <sub>2</sub> (6.8 bar) | 1-butanol                            | 220        | 10       | 100           | 49            | 2         |
| 5.     | 10 wt% Pd/C                                                       | H <sub>2</sub> (62 bar)  | [EMIM]Cl & acetonitrile              | 120        | 1        | 47            | 15            | 3         |
| 6.     | 5wt% Ru/C                                                         | H <sub>2</sub>           | 1-butanol                            | 260        | 1.5      | 99.8          | 60.3          | 4         |
| 7.     | 5wt% Ru/Co <sub>3</sub> O <sub>4</sub>                            | H <sub>2</sub> (7 bar)   | THF                                  | 130        | 24       | 100           | 93.4          | 5         |
| 8.     | Ru-Sn/C                                                           | H <sub>2</sub>           | lactones                             | 200        | 4        | --            | 46            | 6         |
| 9.     | 5wt% Pd/C                                                         | H <sub>2</sub> (10 bar)  | CO <sub>2</sub> and H <sub>2</sub> O | 80         | 2        | 100           | 100           | 7         |
| 10.    | Pt-Co @ Hollow Carbon Sphere<br>(Pt = 11.99 wt% & Co = 12.23 wt%) | H <sub>2</sub> (10 bar)  | 1-butanol                            | 180        | 2        | 100           | 98            | 8         |
| 11.    | Ni-W <sub>2</sub> C/AC<br>(Ni = 10.28 wt% & W = 47.78 wt%)        | H <sub>2</sub> (40 bar)  | THF                                  | 180        | 3        | 100           | 96            | 9         |
| 12.    | Pd-Au/C + HCl                                                     | H <sub>2</sub> (1 bar)   | THF                                  | 60         | 6        | 100           | 96            | 10        |
| 13.    | Ru/hydrotalcite<br>(Ru = 0.56 wt%)                                | H <sub>2</sub> (10 bar)  | 2-propanol                           | 220        | 4        | 100           | 58            | 11        |
| 14.    | 2wt% Ru/NaY                                                       | H <sub>2</sub> (15 bar)  | THF                                  | 220        | 1        | 100           | 78            | 12        |
| 15.    | Cu-Porous Metal Oxides                                            | methanol                 | methanol                             | 260        | 3        | 100           | 48            | 13        |

[a] Corn stover derived crude HMF.

**Part B: Hydrogenolysis of Furfural to MF over various metal catalysts.**

| Entry | Catalyst               | Hydrogen source | Solvent    | Temp. (°C) | Time (h)    | Furfural conv. (%) | MF yield (%) | Ref.      |
|-------|------------------------|-----------------|------------|------------|-------------|--------------------|--------------|-----------|
| 16.   | 2wt% Ru-NMC-3          | 2-propanol      | 2-propanol | 140        | 10          | 100                | 87           | This work |
| 17.   | Ni-Fe/SiO <sub>2</sub> | H <sub>2</sub>  | --         | 250        | W/F = 0.1 h | 96.3               | 39           | 14        |



|         |                                        |                         |                              |     |     |      |      |           |
|---------|----------------------------------------|-------------------------|------------------------------|-----|-----|------|------|-----------|
| 18.     | 5wt% Ru/C                              | 2-propanol              | 2-propanol                   | 180 | 10  | 95   | 61   | <b>15</b> |
| 19.     | 5wt% Ru/C                              | 2-butanol               | 2-butanol                    | 180 | 10  | 100  | 76   | <b>16</b> |
| 20.     | Cu–Fe Catalyst                         | H <sub>2</sub> (90 bar) | Octane                       | 220 | 14  | 99   | 51   | <b>17</b> |
| 21.     | 5wt% Pt/C                              | H <sub>2</sub> (80 bar) | 1-butanol                    | 175 | 0.5 | 99.3 | 40.4 | <b>18</b> |
| 22. [b] | 5wt% Pt/C                              | H <sub>2</sub> (30 bar) | 1-butanol + H <sub>2</sub> O | 175 | 0.5 | 100  | 36.6 | <b>19</b> |
| 23.     | 2wt% Pd/Fe <sub>2</sub> O <sub>3</sub> | 2-propanol              | 2-propanol                   | 180 | 7.5 | 100  | 13   | <b>20</b> |
| 24. [c] | Cu–Fe/SiO <sub>2</sub>                 | H <sub>2</sub>          | toluene                      | 252 | --  | 99   | 98   | <b>21</b> |
| 25.     | 5wt% Ru/C                              | H <sub>2</sub>          | 1-butanol                    | 260 | 1.5 | 99.8 | 61.9 | <b>4</b>  |

[b] Furfuryl alcohol as reactant with H<sub>3</sub>PO<sub>4</sub> as an additive. [c] Vapour phase hydrogenation of furfural.

### References for Literature review:

- 1) Y. Román-Leshkov, C. J. Barrett, Z. Y. Liu, J. A. Dumesic, *Nature* **2007**, 447, 982.
- 2) J. B. Binder and R. T. Raines, *J. Am. Chem. Soc.*, 2009, **131**, 1979;
- 3) M. Chidambaram and A. T. Bell, *Green Chem.*, 2010, **12**, 1253;
- 4) J. Zhang, L. Lin and S. Liu, *Energy Fuels*, 2012, **26**, 4560;
- 5) Y. Zu, P. Yang, J. Wang, X. Liu, J. Ren, G. Lu and Y. Wang, *Appl. Catal. B*, 2014, **146**, 244;
- 6) J. M. R. Gallo, D. M. Alonso, M. A. Mellmer and J. A. Dumesic, *Green Chem.*, 2013, **15**, 85;
- 7) M. Chatterjee, T. Ishizaka and H. Kawanami, *Green Chem.*, 2014, **16**, 1543;
- 8) G.-H. Wang, J. Hilgert, F. H. Richter, F. Wang, H.-J. Bongard, B. Spliethoff, C. Weidenthaler and F. Schuth, *Nat. Mater.*, 2014, **13**, 293;
- 9) Y. B. Huang, M. Y. Chen, L. Yan, Q. X. Guo and Y. Fu, *ChemSusChem*, 2014, **7**, 1068;
- 10) S. Nishimura, N. Ikeda and K. Ebitani, *Catal. Today*, 2014, **232**, 89;
- 11) A. S. Nagpure, A. K. Venugopal, N. Lucas, M. Manikandan, R. Thirumalaiswamy and S. Chilukuri, *Catal. Sci. Technol.*, 2015, **5**, 1463;
- 12) A. S. Nagpure, N. Lucas and S. V. Chilukuri, *ACS Sustainable Chem. Eng.*, 2015, **3**, 2909;
- 13) T. S. Hansen, K. Barta, P. T. Anastas, P. C. Ford and A. Riisager, *Green Chem.*, 2012, **14**, 2457.
- 14) S. Sitthisa, W. An and D. E. Resasco, *J. Catal.*, 2011, **284**, 90;
- 15) P. Panagiotopoulou and D. G. Vlachos, *Appl. Catal. A*, 2014, **480**, 17;
- 16) P. Panagiotopoulou, N. Martin and D. G. Vlachos, *J. Mol. Catal. A*, 2014, **392**, 223
- 17) K. Yan and A. Chen, *Fuel*, 2014, **115**, 101;
- 18) M. Hronec and K. Fulajtarová, *Catal. Comm.*, 2012, **24**, 100;
- 19) M. Hronec, K. Fulajtarova, T. Liptaj, *Appl. Catal. A*, 2012, **437–438**, 104;
- 20) D. Scholz, C. Aellig, I. Hermans, *ChemSusChem* **2014**, **7**, 268;
- 21) J. Lessard, J.-F. Morin, J.-F. Wehrung, D. Magnin, E. Chornet, *Top. Catal.*, 2010, **53**, 1231.
